# Supplementary material
Source: MDPI journal article supplement (https://www.mdpi.com/2571-6255/5/5/171)
Supplement: s1 [file s1]

(\*\*:  $P < 0.01$ , \*:  $P < 0.05$ ; EL: elevation; TEMP: temperature; H': Shannon-Wiener index; E: Pielou

index; D: Simpson index; Ma: Margalef index)

[illegible]
